# Supplementary material for: High-pressure experiments as a novel perspective to study the molecular dynamics of glass-forming materials confined at the nanoscale
Source: Royal Society of Chemistry journal article supplement (doi:10.1039/d0nr02255a), 2020-01-01
Supplement: d0nr02255a1.pdf [file d0nr02255a1.pdf]

## Supporting Information

# High-pressure experiments as a novel perspective to study the molecular dynamics of glass-forming materials confined at the nanoscale

Magdalena Tarnacka<sup>†‡\*</sup>, Michał Mierzwa<sup>†‡</sup>, Ewa Kamińska<sup>#</sup>, Kamil Kamiński<sup>†‡\*</sup>,

Marian Paluch<sup>†‡</sup>

<sup>†</sup>*Institute of Physics, University of Silesia, ul. 75 Pulku Piechoty 1, 41-500 Chorzow, Poland*

<sup>‡</sup>*Silesian Center of Education and Interdisciplinary Research, University of Silesia, ul. 75 Pulku Piechoty 1A, 41-500 Chorzow, Poland*

<sup>#</sup>*Department of Pharmacognosy and Phytochemistry, Faculty of Pharmaceutical Sciences in Sosnowiec, Medical University of Silesia in Katowice, ul. Jagiellonska 4, 41-200 Sosnowiec, Poland*

\* Corresponding author: (MT) [magdalena.tarnacka@smcebi.edu.pl](mailto:magdalena.tarnacka@smcebi.edu.pl)  
(KK) [kamil.kaminski@us.edu.pl](mailto:kamil.kaminski@us.edu.pl); [kamil.kaminski@smcebi.edu.pl](mailto:kamil.kaminski@smcebi.edu.pl)

## Experimental section

### *Differential Scanning Calorimetry (DSC)*

Calorimetric measurements were carried out using a Mettler–Toledo DSC apparatus (Mettler–Toledo International, Inc., Greifensee, Switzerland) equipped with a liquid nitrogen cooling accessory and an HSS8 ceramic sensor (heat flux sensor with 120 thermocouples). Temperature and enthalpy calibrations were investigated using indium and zinc standards, while the heat capacity  $C_p$  calibration was performed using a sapphire disc. Measurements were carried out on the confined DGEBA before and immediately after the performed high pressure measurements. In the case of confined systems, the filled membranes were crushed to fix the measurement alumina crucibles. The samples were contained in sealed crucibles, and the heating rate was equal to 10 K/min over a temperature range from 170 K to 300 K.

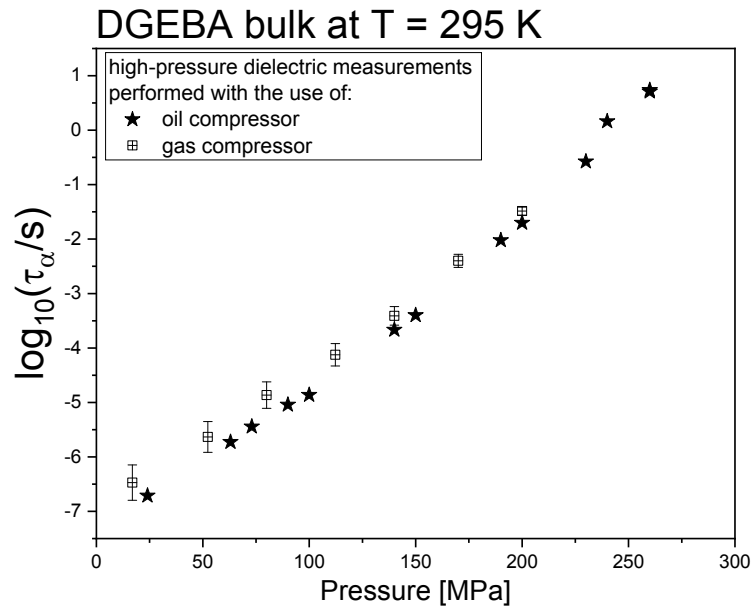

**Figure S1.** Pressure dependence of structural relaxation times,  $\tau_{\alpha}$ , collected for bulk DGEBA obtained with the use of either oil (stars) or gas (crossed squares) compressor.

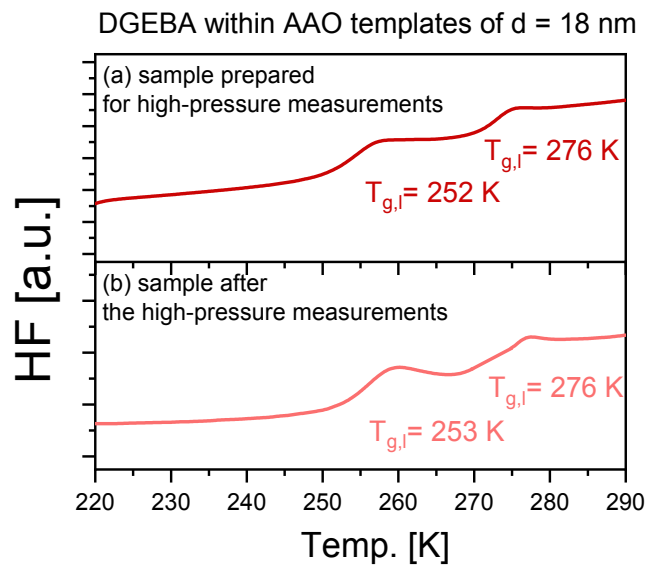

**Figure S2.** DSC thermograms obtained for DGEBA confined within AAO templates of  $d = 18$  nm before and after the performed high-pressure measurements.
